# Supplementary material for: Amplicon-based long-read sequencing for accurate CYP2D6 gene deletion and duplication detection using CYP2D7 as a reference gene
Source: Research Square preprint supplement (doi:10.21203/rs.3.rs-8458208/v1), 2026-01-14
Supplement: Supplementary file 1 [file 6e83534a9711e3b9c91f248a.xlsx]

## Sheet: Sheet1
Table 3: CYP2D6 copy number of variation (CNV), CYP2D6: CYP2D7 read depth ratio and allele frequency ratio
ID	CYP2D6 CNV	Copy number (CN)	CYP2D6:CYP2D7 read depth ratio	CYP2D6 allele frequency (AF) ratio
NA10005	Wild	CN=2	01:01:00	0.46
NA10181	Wild	CN=2	1.39:1	0.45
NA19789	Wild	CN=2	01:01:00	na
NA23877	Wild	CN=2	01:01:00	0.43
NA08873	Deletion	CN=1	00:01:01.600000	na
NA19317	Deletion	CN=0	01:00:00	na
NA07439	Duplication	CN=3	1.4:1	0.3
NA17244	Duplication	CN=4	02:01:00	0.5
NA17454	Duplication	CN=4	02:01:00	0.5
NA18526	Duplication	CN=3	1.6:1	0.4
*AF= na (not available) is for individuals without a variant or when all the variants were homozygous and unable to compare AF
