# Supplementary material for: Amplicon-based long-read sequencing for accurate CYP2D6 gene deletion and duplication detection using CYP2D7 as a reference gene
Source: Research Square preprint supplement (doi:10.21203/rs.3.rs-8458208/v1), 2026-01-14
Supplement: Supplementary file 2 [file b1e70e617b8f308c476b33a5.xlsx]

## Sheet: Sheet1
Table 2: Primer sequences for CYP2D6, CYP2D7, CYP2D8, CYP2D6-2D7 hybrids and overlapping read for the entire CYP2D loci.
Target region	Primers	Amplicon size (kb)	Type of PCR
CYP2D6	F: ATGGCAGCTGCCATACAATCCACCTG	6.6	Triplex
	R: ACTGAGCCCTGGGAGGTAGGTAG
CYP2D7	F: GTGGCTGCCCCATGTCATGTATTGG	6.3
	R: GCCCTGGGAGGTAGCCCTGGCATA
CYP2D8	F: TCATTCAGCTGAGGCCAGTTTGGGA	6.6
	R: CTGGTGGTCACGTGAAGTCAGGAGT
Entire CYP2D	F: GGGGATGGGGTCTTGCTAGGTCTC	9	Singleplex
(CYP2D6 region)	R: CTGGGAGGTAGGTAGCCCTGGCATA
Entire CYP2D	R: CGGCAGTGGTCAGCTAATGAC	11.5
(CYP2D7 region)	F: TCATTCAGCTGAGGCCAGTTTGGGA
Entire CYP2D	F: GCCACCATGTAACAAGCACCCAGAC	8.3
(CYP2D8 region)	R: CCACATTCAGCATTGGACGGGTGTC
CYP26-2D7 Hybrids	F: 5′ ATGGCAGCTGCCATACAATCCACCTG	5.47
	R: 5' GCCCTGGGAGGTAGCCCTGGCATA
