# Supplementary material for: Amplicon-based long-read sequencing for accurate CYP2D6 gene deletion and duplication detection using CYP2D7 as a reference gene
Source: Research Square preprint supplement (doi:10.21203/rs.3.rs-8458208/v1), 2026-01-14
Supplement: Supplementary file 3 [file c027c72bb9e2f5e9eded0f40.xlsx]

## Sheet: Sheet1
Table 1: List of individuals with their genotype and CYP2D6 characteristics
Coriell Institute cell reference	Ethnicity	CYP2D6 gene characteristics	CYP2D6 gene Genotype
HG00111	British	Wild	*3/*3
NA10005	Black/African America	Wild	*17/*29
NA10181	Ashkenazi/White	Wild	*1/*41
NA19789	Mexican Ancestry	Wild	*1/*1
NA23877	NA	Wild	*15/*41
NA08873	African American	Partial deletion	*5/*17
NA19317	Luhya	Full deletion	*5/*5
NA17164	African American	Partial duplication	*4x2/*41
NA17244	White	Full duplication and CYP2D6::CYP2D7 hybrid	*2×2/*4×2 (+hybrid)
NA17454	Mexican American	Full duplication	*1x2/*2x2
NA18526	Han Chinese	Partial duplication and CYP2D6::CYP2D7 hybrid	*1/*36x2+*10
HG00463	Southern Han Chinese	CYP2D6::CYP2D7 hybrid	*36+*10/*36+*10
NA12154	Utah/Mormon/White	CYP2D6::CYP2D7 hybrid	(*68) +*4/*33
NA17209	White	CYP2D6::CYP2D7 hybrid	*1/*4 + *36
NA17287	Italian/white	CYP2D6::CYP2D7 hybrid	*1/*83
NA18540	Han Chinese	CYP2D6::CYP2D7 hybrid	(*36+)10/*41
NA18564	Han Chinese	CYP2D6::CYP2D7 hybrid	*2A/*36+*10
*Wild CYP2D6 gene characteristics indicate the absence of CNV/SV
